# Supplementary material for: Whole Genome Association Mapping of Plant Height in Winter Wheat (Triticum aestivum L.)
Source: PLOS journal article supplement (doi:10.1371/journal.pone.0113287), 2014-11-18
Supplement: S3 (10.1371/journal.pone.0113287.s003) [file journal.pone.0113287.s003]

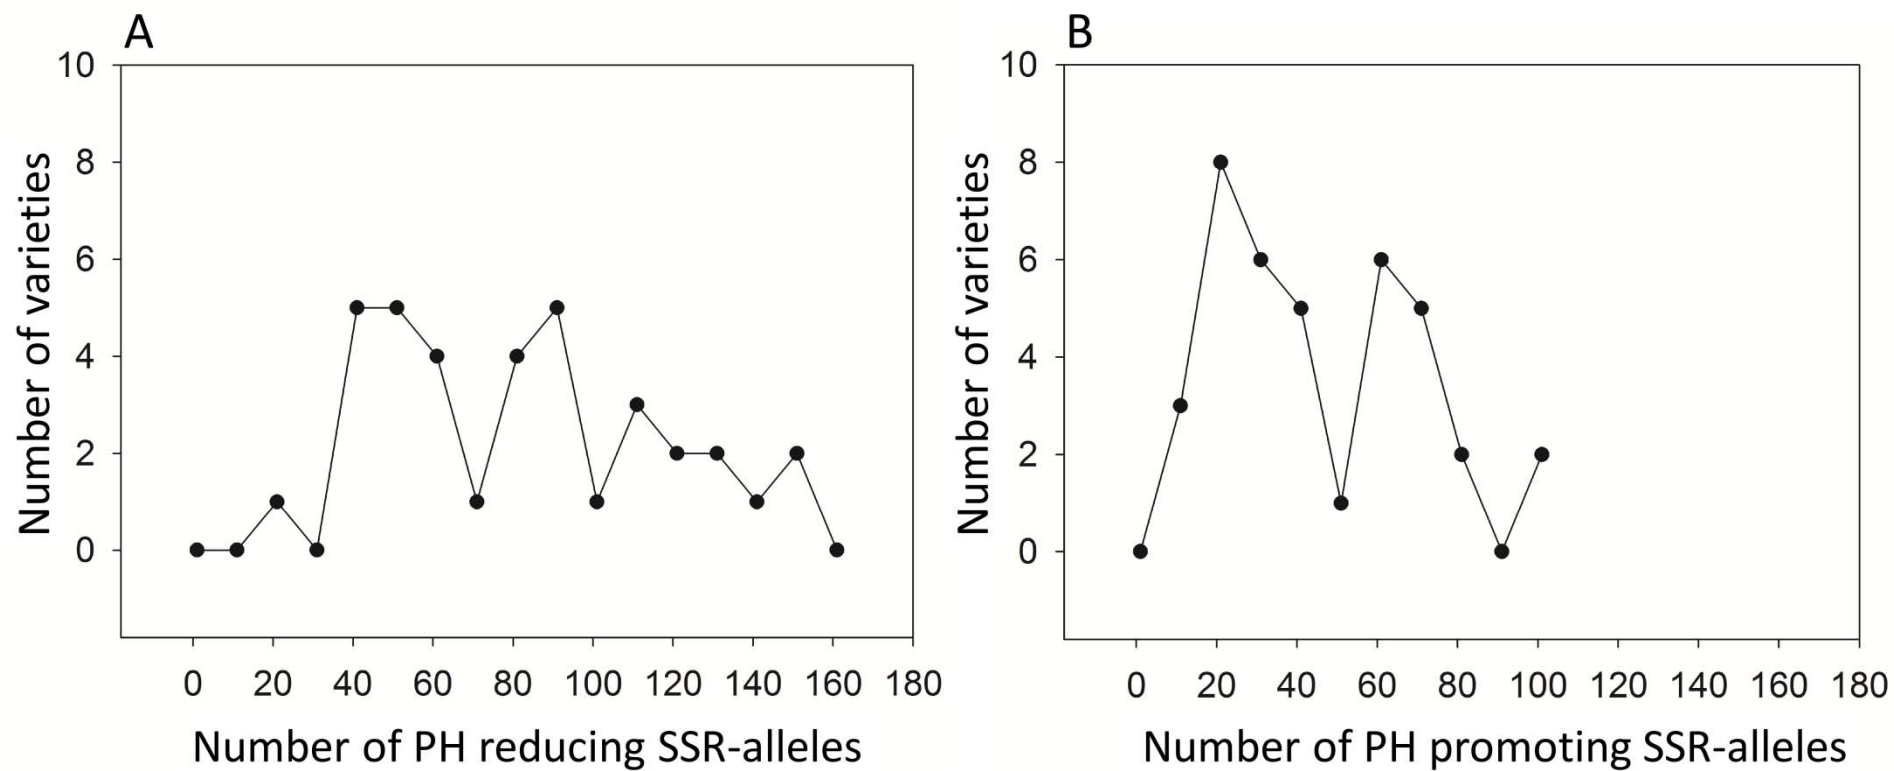

Figure S3: Frequency of (A) PH reducing and (B) PH promoting SSR-alleles per variety.
